# Supplementary material
Source: PubMed Central journal article supplement (PMC5871569)
Supplement: NIHMS944215-supplement-COAs.pdf [file NIHMS944215-supplement-COAs.pdf]

**Change of Authorship Form**

(Must be completed and signed by ALL authors)

Please check all that apply

\_\_\_\_ New author(s) have been added (in addition to this form, all new authors must complete the copyright transfer agreement and conflict of interest disclosure.

Change in order of authorship.

\_\_\_\_ An author wishes to remove his/her name. An author's name may only be removed his/her own request and a letter signed by the author should accompany this form

Manuscript Number STROKE/2017/0948R1

Manuscript Title Endothelial progenitor cell secretome and oligovascular repair in a mouse model of prolonged cerebral hypoperfusion

**Former Authorship**

Please list ALL AUTHORS in the same order as the original submission. For more than 12, use an extra sheet.

**Print Name**

Name (1) Takakuni Maki  
Name (2) Anna Morancho  
Name (3) Pablo Martínez-San Segundo  
Name (4) Kazuhide Hayakawa  
Name (5) Hajime Takase  
Name (6) Anna C. Liang

**Print Name**

Name (7) Marina Gabriel-Salazar  
Name (8) Esperanza Medina-Gutierrez  
Name (9) Kazuo Washida  
Name (10) Juan Montaner  
Name (11) Josephine Lok  
Name (12) Eng H. Lo

**New Authorship**

All authors must sign below agreeing to the changes in authorship. The authorship order must reflect the authorship order of the manuscript.

|                                            |                                         |                          |
|--------------------------------------------|-----------------------------------------|--------------------------|
| Name (1) <u>Takakuni Maki</u>              | Signature <u>Takakuni Maki</u>          | Date <u>1st Feb 2018</u> |
| Name (2) <u>Anna Morancho</u>              | Signature <u>Anna Morancho</u>          | Date <u>3rd Feb 2018</u> |
| Name (3) <u>Pablo Martínez-San Segundo</u> | Signature _____                         | Date _____               |
| Name (4) <u>Kazuhide Hayakawa</u>          | Signature <u>Kazuhide Hayakawa</u>      | Date <u>2/2/2018</u>     |
| Name (5) <u>Hajime Takase</u>              | Signature <u>Hajime Takase</u>          | Date <u>2/2/2018</u>     |
| Name (6) <u>Anna C. Liang</u>              | Signature <u>Anna C. Liang</u>          | Date <u>2/2/18</u>       |
| Name (7) <u>Marina Gabriel-Salazar</u>     | Signature <u>Marina Gabriel-Salazar</u> | Date <u>2nd Feb 2018</u> |
| Name (8) <u>Esperanza Medina-Gutierrez</u> | Signature _____                         | Date _____               |
| Name (9) <u>Kazuo Washida</u>              | Signature <u>Kazuo Washida</u>          | Date <u>2/2/2018</u>     |
| Name (10) <u>Juan Montaner</u>             | Signature _____                         | Date <u>2nd Feb 2018</u> |
| Name (11) <u>Josephine Lok</u>             | Signature <u>Josephine Lok</u>          | Date <u>2/2/18</u>       |
| Name (12) <u>Eng H. Lo</u>                 | Signature <u>Eng H. Lo</u>              | Date <u>2/2/2018</u>     |

Please scan and email to [stroke@strokeahajournal.org](mailto:stroke@strokeahajournal.org).

**Change of Authorship Form**

(Must be completed and signed by ALL authors)

Please check all that apply

\_\_\_\_ New author(s) have been added (in addition to this form, all new authors must complete the copyright transfer agreement and conflict of interest disclosure.

Change in order of authorship.

\_\_\_\_ An author wishes to remove his/her name. An author's name may only be removed his/her own request and a letter signed by the author should accompany this form

Manuscript Number STROKE20170183481

Manuscript Title Endothelial progenitor cell secretome and oligonucleolar repair in a mouse model of prolonged cerebral hypoperfusion

**Former Authorship**

Please list ALL AUTHORS in the same order as the original submission. For more than 12, use an extra sheet.

**Print Name**

Name (1) 13. Ken Arai  
Name (2) 14. Anna Rosell  
Name (3) \_\_\_\_\_  
Name (4) \_\_\_\_\_  
Name (5) \_\_\_\_\_  
Name (6) \_\_\_\_\_

**Print Name**

Name (7) \_\_\_\_\_  
Name (8) \_\_\_\_\_  
Name (9) \_\_\_\_\_  
Name (10) \_\_\_\_\_  
Name (11) \_\_\_\_\_  
Name (12) \_\_\_\_\_

**New Authorship**

All authors must sign below agreeing to the changes in authorship. The authorship order must reflect the authorship order of the manuscript.

|                                 |                              |                               |
|---------------------------------|------------------------------|-------------------------------|
| Name (1) <u>13. Ken Arai</u>    | Signature <u>K Arai</u>      | Date <u>4/2/2018</u>          |
| Name (2) <u>14. Anna Rosell</u> | Signature <u>[Signature]</u> | Date <u>February 15, 2018</u> |
| Name (3) _____                  | Signature _____              | Date _____                    |
| Name (4) _____                  | Signature _____              | Date _____                    |
| Name (5) _____                  | Signature _____              | Date _____                    |
| Name (6) _____                  | Signature _____              | Date _____                    |
| Name (7) _____                  | Signature _____              | Date _____                    |
| Name (8) _____                  | Signature _____              | Date _____                    |
| Name (9) _____                  | Signature _____              | Date _____                    |
| Name (10) _____                 | Signature _____              | Date _____                    |
| Name (11) _____                 | Signature _____              | Date _____                    |
| Name (12) _____                 | Signature _____              | Date _____                    |

Please scan and email to [stroke@strokeahajournal.org](mailto:stroke@strokeahajournal.org).

## Change of Authorship Form

(Must be completed and signed by ALL authors)

Please check all that apply

\_\_\_\_ New author(s) have been added (in addition to this form, all new authors must complete the copyright transfer agreement and conflict of interest disclosure.

Change in order of authorship.

\_\_\_\_ An author wishes to remove his/her name. An author's name may only be removed his/her own request and a letter signed by the author should accompany this form

**Manuscript Number** STROKE2017/019345/11

**Manuscript Title** Endothelial progenitor cell secretome and cardiovascular repair in a mouse model of prolonged cerebral hypoperfusion

### Former Authorship

Please list ALL AUTHORS in the same order as the original submission. For more than 12, use an extra sheet.

#### Print Name

Name (1) Takakuni Maki  
Name (2) Anna Morancho  
Name (3) Pablo Martinez-San Segundo  
Name (4) Kazuhide Hayakawa  
Name (5) Hajime Takase  
Name (6) Anna C. Liang

#### Print Name

Name (7) Marina Gabriel-Salazar  
Name (8) Esperanza Medina-Gutierrez  
Name (9) Kazuo Washida  
Name (10) Joan Montaner  
Name (11) Josephine Lok  
Name (12) Eng H. Lo

### New Authorship

All authors must sign below agreeing to the changes in authorship. The authorship order must reflect the authorship order of the manuscript.

|                                            |                                                                                                |                          |
|--------------------------------------------|------------------------------------------------------------------------------------------------|--------------------------|
| Name (1) <u>Takakuni Maki</u>              | Signature _____                                                                                | Date _____               |
| Name (2) <u>Anna Morancho</u>              | Signature _____                                                                                | Date _____               |
| Name (3) <u>Pablo Martinez-San Segundo</u> | Signature _____                                                                                | Date _____               |
| Name (4) <u>Kazuhide Hayakawa</u>          | Signature _____                                                                                | Date _____               |
| Name (5) <u>Hajime Takase</u>              | Signature _____                                                                                | Date _____               |
| Name (6) <u>Anna C. Liang</u>              | Signature _____                                                                                | Date _____               |
| Name (7) <u>Marina Gabriel-Salazar</u>     | Signature  | Date <u>2nd Feb 2018</u> |
| Name (8) <u>Esperanza Medina-Gutierrez</u> | Signature   | Date <u>5th Feb 2018</u> |
| Name (9) <u>Kazuo Washida</u>              | Signature _____                                                                                | Date _____               |
| Name (10) <u>Joan Montaner</u>             | Signature _____                                                                                | Date _____               |
| Name (11) <u>Josephine Lok</u>             | Signature  | Date <u>2nd Feb 2018</u> |
| Name (12) <u>Eng H. Lo</u>                 | Signature _____                                                                                | Date _____               |

Please scan and email to [stroke@strokeahajournal.org](mailto:stroke@strokeahajournal.org).

**Change of Authorship Form**

(Must be completed and signed by ALL authors)

Please check all that apply

New author(s) have been added (in addition to this form, all new authors must complete the copyright transfer agreement and conflict of interest disclosure.

Change in order of authorship.

An author wishes to remove his/her name. An author's name may only be removed his/her own request and a letter signed by the author should accompany this form

Manuscript Number STROKE/2017/01994BR1

Manuscript Title Endothelial progenitor cell secretome and oligovascular repair in a mouse model of prolonged cerebral hypoperfusion

**Former Authorship**

Please list ALL AUTHORS in the same order as the original submission. For more than 12, use an extra sheet.

**Print Name**

Name (1) 13. Ken Arai  
Name (2) 14. Anna Rosell  
Name (3) \_\_\_\_\_  
Name (4) \_\_\_\_\_  
Name (5) \_\_\_\_\_  
Name (6) \_\_\_\_\_

**Print Name**

Name (7) \_\_\_\_\_  
Name (8) \_\_\_\_\_  
Name (9) \_\_\_\_\_  
Name (10) \_\_\_\_\_  
Name (11) \_\_\_\_\_  
Name (12) \_\_\_\_\_

**New Authorship**

All authors must sign below agreeing to the changes in authorship. The authorship order must reflect the authorship order of the manuscript.

|                                 |                              |                               |
|---------------------------------|------------------------------|-------------------------------|
| Name (1) <u>13. Ken Arai</u>    | Signature _____              | Date _____                    |
| Name (2) <u>14. Anna Rosell</u> | Signature <u>[Signature]</u> | Date <u>February 15, 2018</u> |
| Name (3) _____                  | Signature _____              | Date _____                    |
| Name (4) _____                  | Signature _____              | Date _____                    |
| Name (5) _____                  | Signature _____              | Date _____                    |
| Name (6) _____                  | Signature _____              | Date _____                    |
| Name (7) _____                  | Signature _____              | Date _____                    |
| Name (8) _____                  | Signature _____              | Date _____                    |
| Name (9) _____                  | Signature _____              | Date _____                    |
| Name (10) _____                 | Signature _____              | Date _____                    |
| Name (11) _____                 | Signature _____              | Date _____                    |
| Name (12) _____                 | Signature _____              | Date _____                    |

Please scan and email to [stroke@strokeahajournal.org](mailto:stroke@strokeahajournal.org).

## Change of Authorship Form

(Must be completed and signed by ALL authors)

Please check all that apply

New author(s) have been added (in addition to this form, all new authors must complete the copyright transfer agreement and conflict of interest disclosure.

Change in order of authorship.

An author wishes to remove his/her name. An author's name may only be removed his/her own request and a letter signed by the author should accompany this form

Manuscript Number STROKE2017019348R1

Manuscript Title Endothelial progenitor cell secretome and oligovascular repair in a mouse model of prolonged cerebral hypoperfusion

### Former Authorship

Please list ALL AUTHORS in the same order as the original submission. For more than 12, use an extra sheet.

#### Print Name

Name (1) Takakuni Maki  
Name (2) Anna Morancho  
Name (3) Pablo Martínez-San Segundo  
Name (4) Kazuhide Hayakawa  
Name (5) Hajime Takase  
Name (6) Anna C. Liang

#### Print Name

Name (7) Marina Gabriel-Salazar  
Name (8) Esperanza Medina-Gutierrez  
Name (9) Kazuo Washida  
Name (10) Joan Montaner  
Name (11) Josephine Lok  
Name (12) Eng H. Lo

### New Authorship

All authors must sign below agreeing to the changes in authorship. The authorship order must reflect the authorship order of the manuscript.

|                                            |                                                                                                       |                          |
|--------------------------------------------|-------------------------------------------------------------------------------------------------------|--------------------------|
| Name (1) <u>Takakuni Maki</u>              | Signature _____                                                                                       | Date _____               |
| Name (2) <u>Anna Morancho</u>              | Signature _____                                                                                       | Date _____               |
| Name (3) <u>Pablo Martínez-San Segundo</u> | Signature <u></u> | Date <u>2nd Feb 2018</u> |
| Name (4) <u>Kazuhide Hayakawa</u>          | Signature _____                                                                                       | Date _____               |
| Name (5) <u>Hajime Takase</u>              | Signature _____                                                                                       | Date _____               |
| Name (6) <u>Anna C. Liang</u>              | Signature _____                                                                                       | Date _____               |
| Name (7) <u>Marina Gabriel-Salazar</u>     | Signature _____                                                                                       | Date _____               |
| Name (8) <u>Esperanza Medina-Gutierrez</u> | Signature _____                                                                                       | Date _____               |
| Name (9) <u>Kazuo Washida</u>              | Signature _____                                                                                       | Date _____               |
| Name (10) <u>Joan Montaner</u>             | Signature _____                                                                                       | Date _____               |
| Name (11) <u>Josephine Lok</u>             | Signature _____                                                                                       | Date _____               |
| Name (12) <u>Eng H. Lo</u>                 | Signature _____                                                                                       | Date _____               |

Please scan and email to [stroke@strokeahajournal.org](mailto:stroke@strokeahajournal.org).

## Change of Authorship Form

(Must be completed and signed by ALL authors)

Please check all that apply

\_\_\_\_ New author(s) have been added (in addition to this form, all new authors must complete the copyright transfer agreement and conflict of interest disclosure.

Change in order of authorship.

\_\_\_\_ An author wishes to remove his/her name. An author's name may only be removed his/her own request and a letter signed by the author should accompany this form

Manuscript Number STROKE/2017/01934/R1

Manuscript Title Endothelial progenitor cell secretome and oligovascular repair in a mouse model of prolonged cerebral hypoperfusion

### Former Authorship

Please list ALL AUTHORS in the same order as the original submission. For more than 12, use an extra sheet.

#### Print Name

Name (1) 13. Ken Arai  
Name (2) 14. Anna Rosell  
Name (3) \_\_\_\_\_  
Name (4) \_\_\_\_\_  
Name (5) \_\_\_\_\_  
Name (6) \_\_\_\_\_

#### Print Name

Name (7) \_\_\_\_\_  
Name (8) \_\_\_\_\_  
Name (9) \_\_\_\_\_  
Name (10) \_\_\_\_\_  
Name (11) \_\_\_\_\_  
Name (12) \_\_\_\_\_

### New Authorship

All authors must sign below agreeing to the changes in authorship. The authorship order must reflect the authorship order of the manuscript.

|                                 |                 |            |
|---------------------------------|-----------------|------------|
| Name (1) <u>13. Ken Arai</u>    | Signature _____ | Date _____ |
| Name (2) <u>14. Anna Rosell</u> | Signature _____ | Date _____ |
| Name (3) _____                  | Signature _____ | Date _____ |
| Name (4) _____                  | Signature _____ | Date _____ |
| Name (5) _____                  | Signature _____ | Date _____ |
| Name (6) _____                  | Signature _____ | Date _____ |
| Name (7) _____                  | Signature _____ | Date _____ |
| Name (8) _____                  | Signature _____ | Date _____ |
| Name (9) _____                  | Signature _____ | Date _____ |
| Name (10) _____                 | Signature _____ | Date _____ |
| Name (11) _____                 | Signature _____ | Date _____ |
| Name (12) _____                 | Signature _____ | Date _____ |

Please scan and email to [stroke@strokeahajournal.org](mailto:stroke@strokeahajournal.org).
